# Supplementary material for: Co-inoculation of a Pea Core-Collection with Diverse Rhizobial Strains Shows Competitiveness for Nodulation and Efficiency of Nitrogen Fixation Are Distinct traits in the Interaction
Source: PubMed Central journal article supplement (PMC5767787; doi:10.3389/fpls.2017.02249), 2018-01-10
Supplement: Image1.pdf [file Image1.pdf]

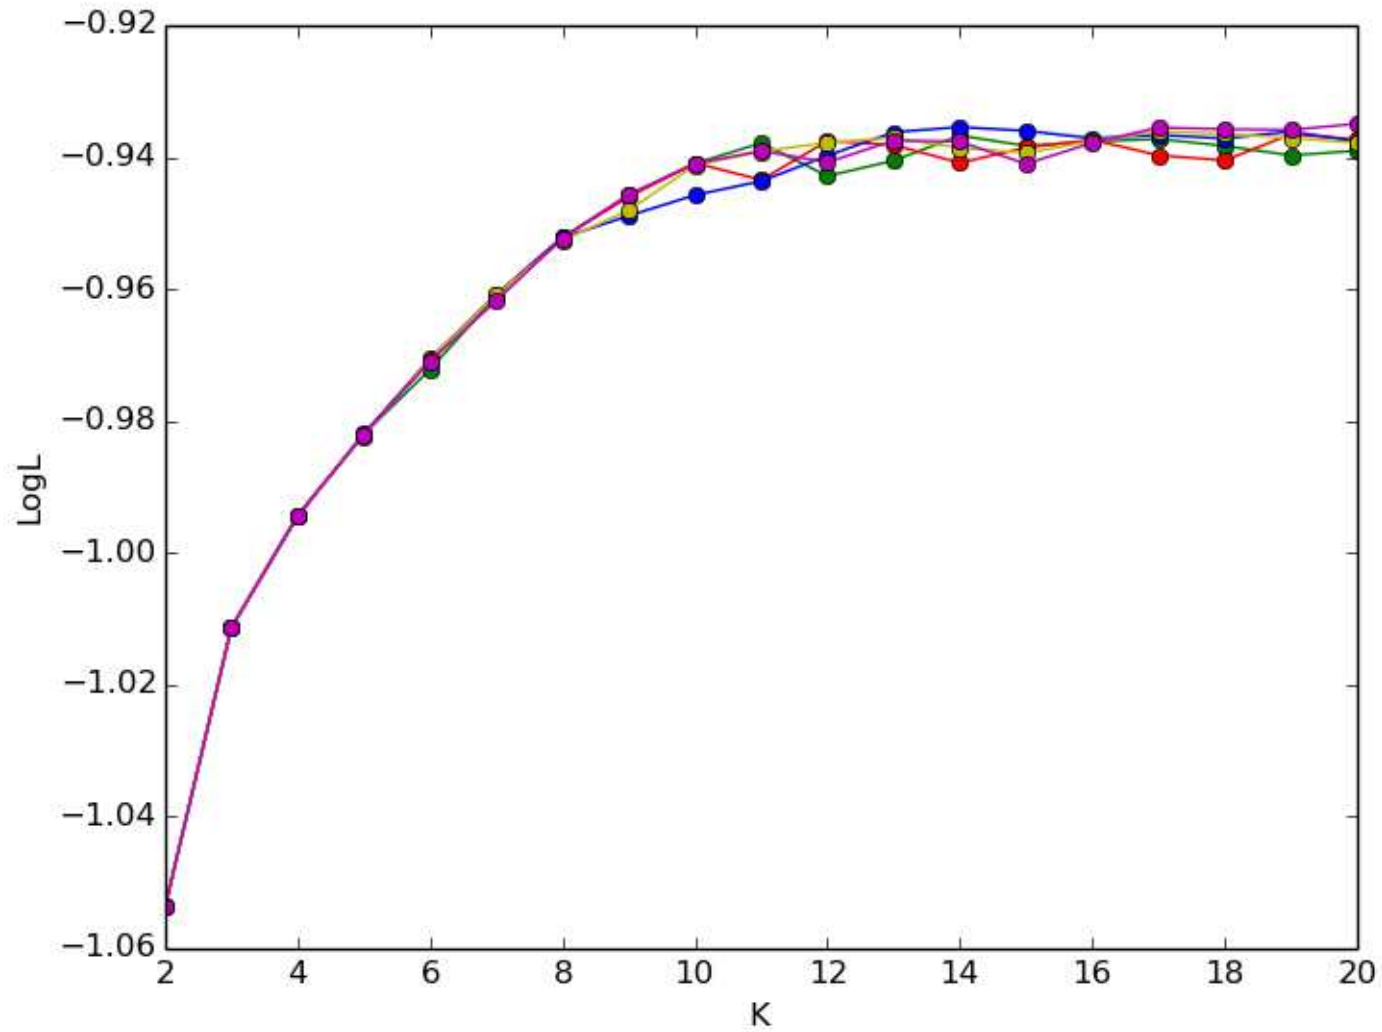

**Figure S1:** fastSTRUCTURE analysis. Log Likelihood of the model as a function of the number of clusters for each of the five runs
