# Supplementary material for: Co-inoculation of a Pea Core-Collection with Diverse Rhizobial Strains Shows Competitiveness for Nodulation and Efficiency of Nitrogen Fixation Are Distinct traits in the Interaction
Source: PubMed Central journal article supplement (PMC5767787; doi:10.3389/fpls.2017.02249), 2018-01-10
Supplement: Image7.pdf [file Image7.pdf]

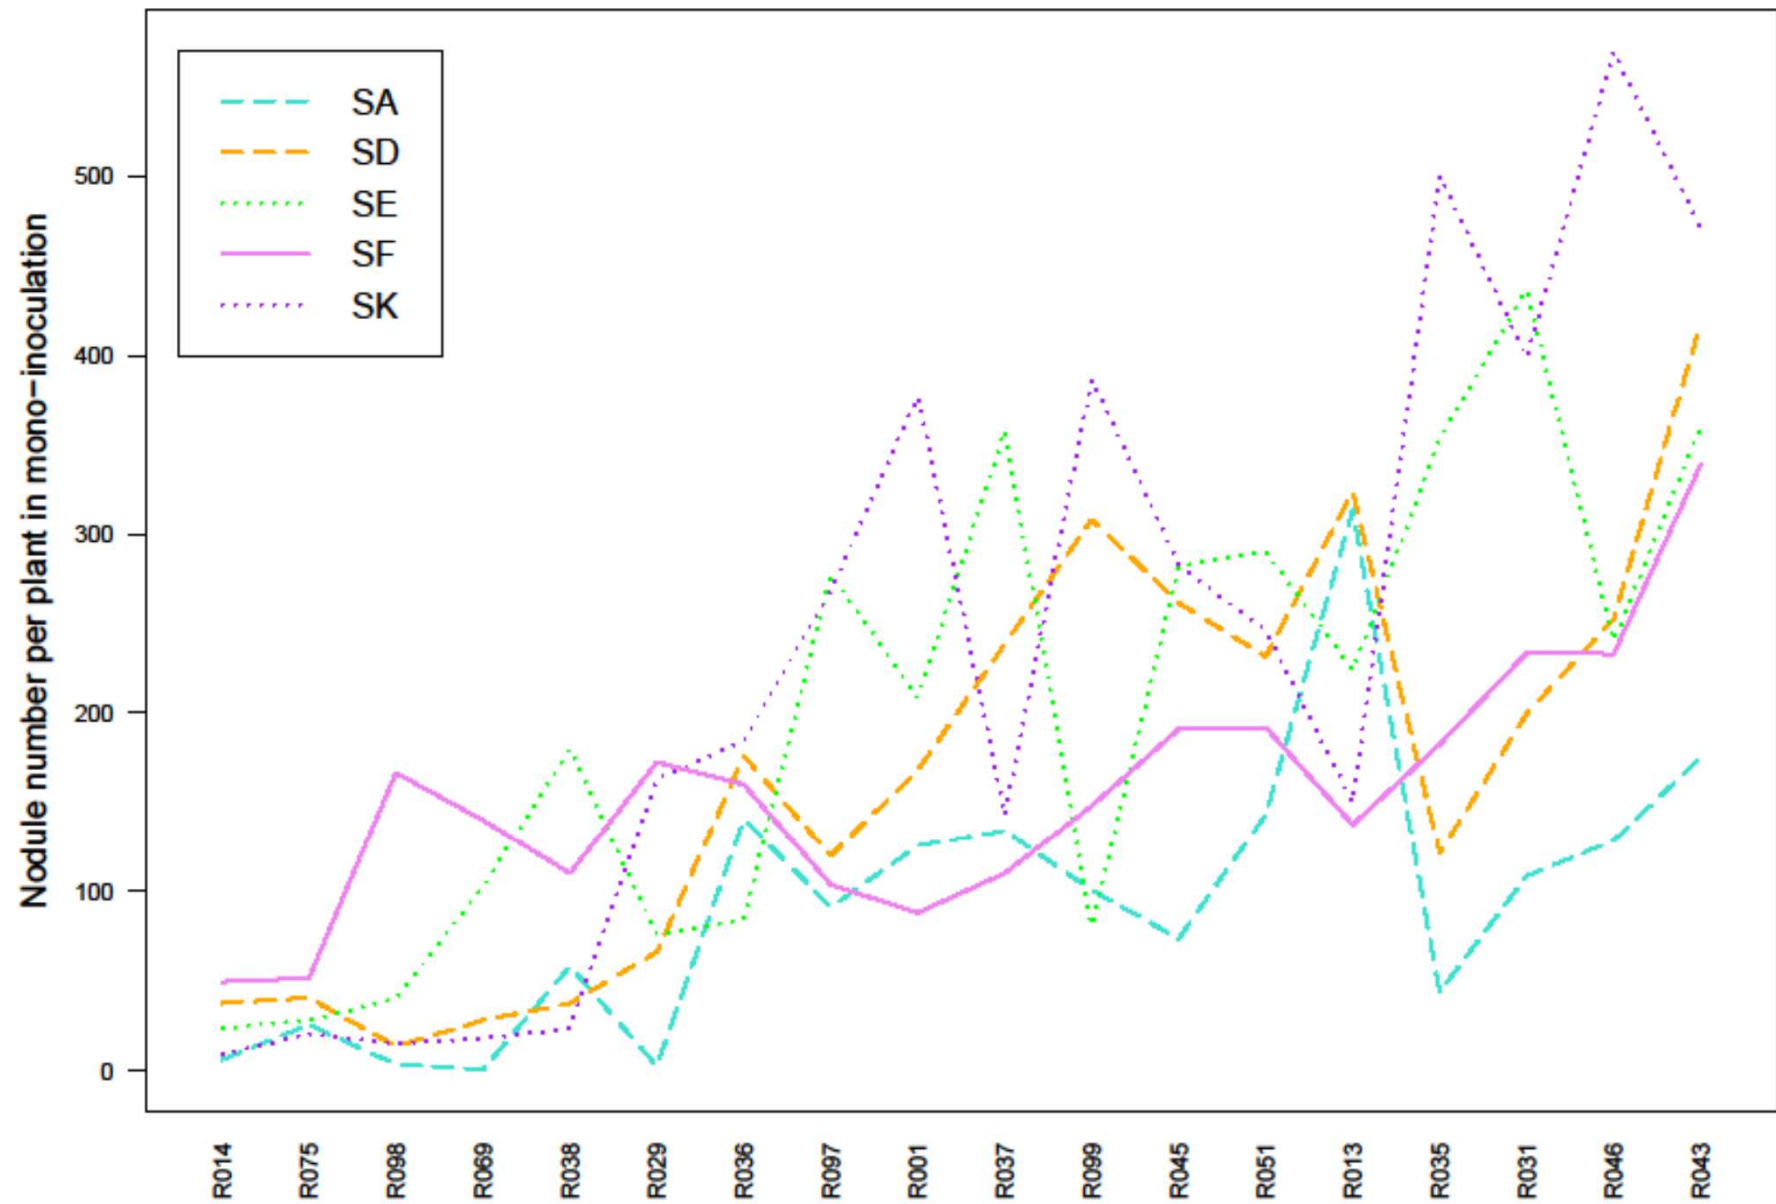

**Figure S7:** Nodule number per plant in 18 pea accessions with each of the five Rlv strains in mono-inoculation experiment (E2)
