# Supplementary material for: Co-inoculation of a Pea Core-Collection with Diverse Rhizobial Strains Shows Competitiveness for Nodulation and Efficiency of Nitrogen Fixation Are Distinct traits in the Interaction
Source: PubMed Central journal article supplement (PMC5767787; doi:10.3389/fpls.2017.02249), 2018-01-10
Supplement: Image8.pdf [file Image8.pdf]

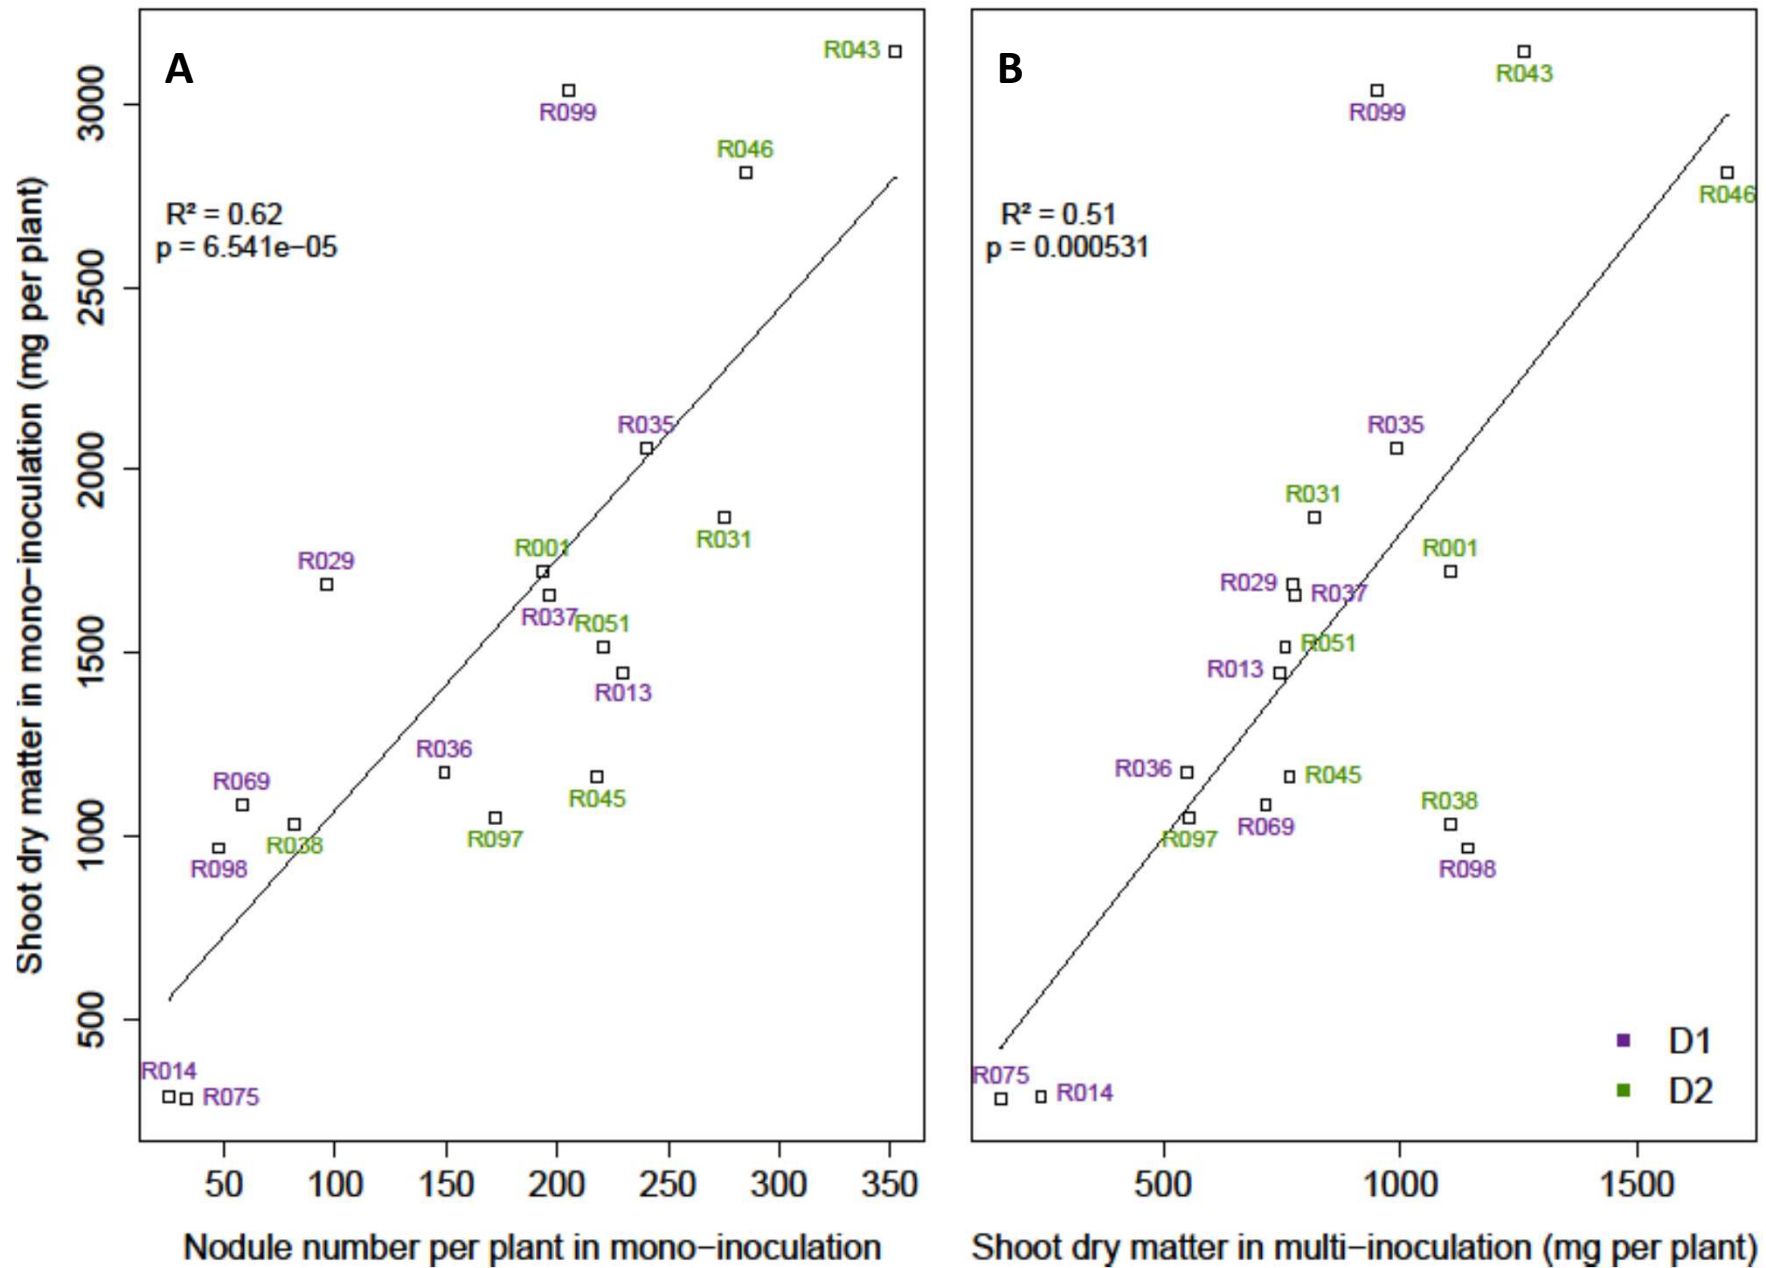

**Figure S8:** Relationship for 18 pea accessions between mean shoot dry matter in the mono-inoculation experiment (E2) and (A) mean nodule number in mono-inoculation experiment (E2) or (B) shoot dry matter in multi-inoculation experiment (E1).
