# Supplementary material for: Co-inoculation of a Pea Core-Collection with Diverse Rhizobial Strains Shows Competitiveness for Nodulation and Efficiency of Nitrogen Fixation Are Distinct traits in the Interaction
Source: PubMed Central journal article supplement (PMC5767787; doi:10.3389/fpls.2017.02249), 2018-01-10
Supplement: Image9.pdf [file Image9.pdf]

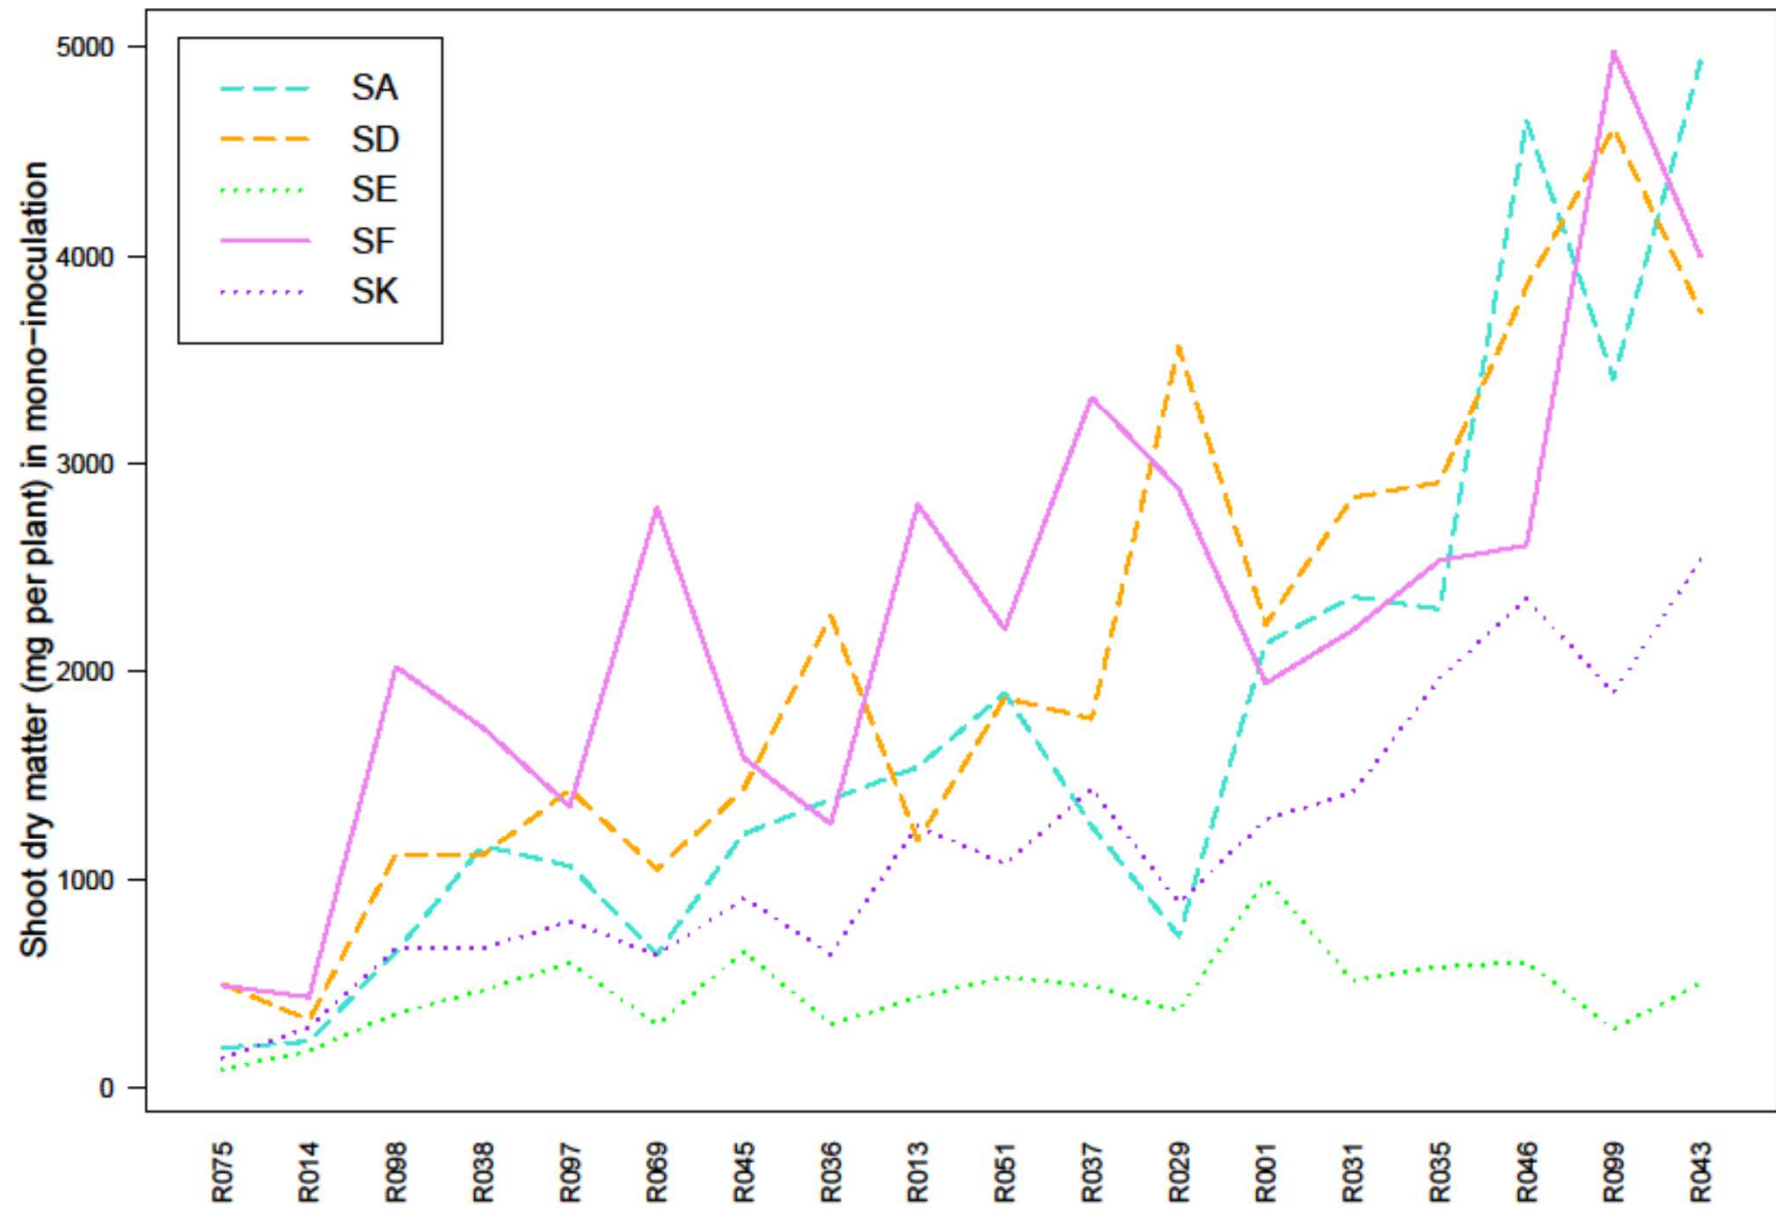

**Figure S9:** Shoot dry matter of 18 pea accessions obtained with each of the five Rlv strains in mono-inoculation (E2)
